# Supplementary material for: Hydrogen-bonded frameworks for conformational analysis of reactive substrates
Source: Royal Society of Chemistry journal article supplement (doi:10.1039/d4cc03430a), 2024-01-01
Supplement: d4cc03430a1.pdf [file d4cc03430a1.pdf]

## Hydrogen-bonded frameworks for conformational analysis of reactive substrates

Alexandra M. Dillon, Alexander G. Shtukenberg, Krystyna M. Demkiw, K. A. Woerpel,\* and Michael D. Ward\*

*Department of Chemistry and Molecular Design Institute, New York University, New York City, New York, 10003, United States, email: [mdw3@nyu.edu](mailto:mdw3@nyu.edu), [kw63@nyu.edu](mailto:kw63@nyu.edu)*

### Supplementary information

#### Contents

#### Materials and Methods.

**Table S1.** Detailed crystallographic data of GCHMS inclusion compounds with 2-fluoro, 2-chloro-, and 2-bromopropiophenone guests.

**Table S2.** Detailed crystallographic data of G<sub>2</sub>BPDS inclusion compounds with 2-fluoro, 2-chloro-, and 2-bromopropiophenone guests.

**Table S3.** Detailed crystallographic data of G<sub>2</sub>1,5NDS inclusion compounds with 2-fluoro, 2-chloro-, and 2-bromopropiophenone guests.

**Table S4.** Detailed crystallographic data of GCHMS inclusion compounds with 2-chlorocyclooctanone and 2-bromocyclooctanone guests.

**Figure S1.** Projection topologies of the architectures observed in the  $\alpha$ -halopropiophenone and  $\alpha$ -halocyclooctanone inclusion compounds.

**Figure S2.** The three low energy minima conformers of the  $\alpha$ -halopropiophenones

**Figure S3.** GS sheets observed in G<sub>2</sub>1,5NDS $\supset$ 2-chloropropiophenone and G<sub>2</sub>1,5NDS $\supset$ 2-bromopropiophenone.

**Figure S4.** Histograms of surveys from the Cambridge Structural Database of  $\alpha$ -halogenated ketones.

**Figure S5.** Low energy conformers of  $\alpha$ -halocyclooctanones.

**Figure S6.** Residual density plot for GCHMS $\supset$ 2-bromopropiophenone.

#### References.

## Materials

Cyclohexane sulfonic acid, 4,4'-biphenyldisulfonic acid and 1,5-naphthalene sulfonic acid were purchased from Sigma-Aldrich (St. Louis, MO). Guest 2-bromopropiophenone was purchased from Oakwood Chemical (West Columbia, SC). Guests 2-fluoropropiophenone<sup>1</sup> and 2-chloropropiophenone<sup>2</sup> were synthesized according to previously reported procedures. Guests 2-bromocyclooctanone and 2-chlorocyclooctanone were also synthesized according to previously reported procedures.<sup>3</sup>

The apo-host salts, guanidium cyclohexanesulfonate, guanidinium 4,4'-biphenyldisulfonate, and guanidinium 1,5-naphthalenedisulfonate, were prepared by combining acetone solutions of approximately 1.10 molar equivalents of guanidinium tetrafluoroborate and 1.0 molar equivalent of the organosulfonic acid to produce a precipitate of the corresponding guest-free apo-host. The precipitate was filtered, and the resulting solid was washed with acetone several times and dried in vacuo, affording the apo-host salt of the corresponding guanidium organosulfonate.

## Methods

**Crystallization.** Single crystals of inclusion compounds were obtained by evaporation of a 1:1 solution of methanol:ethanol containing the target guest molecule (10 mg) and the guanidinium organosulfonate (GS) apohost (10 mg in 500  $\mu$ L of methanol). Single crystals of the inclusion compounds were grown by slow evaporation of the solvent under ambient temperature over a period of several days.

**Single crystal X-ray diffraction.** Crystals were mounted on MiTeGen MicroMount loops with Type B immersion oil (Cargille Labs) and X-ray diffraction data was obtained using several instruments. Data for G<sub>2</sub>BPDS $\supset$ 2-fluoropropiophenone (**4**), G<sub>2</sub>BPDS $\supset$ 2-chloropropiophenone (**5**), G<sub>2</sub>BPDS $\supset$ 2-bromopropiophenone (**6**), G<sub>2</sub>1,5NDS $\supset$ 2-fluoropropiophenone (**7**), G<sub>2</sub>1,5NDS $\supset$ 2-chloropropiophenone (**8**), and G<sub>2</sub>1,5NDS $\supset$ 2-bromopropiophenone (**9**) were collected at 100 K on a Bruker SMART APEX II diffractometer equipped with a PHOTON-II-C14 detector. The X-ray beam generated from an INCOATEC micro-focused source was monochromated and collimated by a Montel multilayer optics (Mo  $K\alpha$  radiation,  $\lambda = 0.71073$  Å). Full data sets were collected with omega and phi scan methods. X-ray diffraction data for compounds (GCHMS)<sub>4</sub> $\supset$ 2-chloropropiophenone (**2**) and (GCHMS)<sub>4</sub> $\supset$ 2-bromopropiophenone (**3**) were collected at 130 K on a Bruker D8 VENTURE diffractometer using Cu  $K\alpha$  radiation ( $\lambda = 1.5406$  Å). For both Bruker instruments, the data sets were processed with the INTEGRATE program of the APEX4 software for reduction and cell refinement.<sup>4</sup> Multi-scan absorption corrections were applied by the SCALE program for the area detector. X-ray diffraction data for compounds GCHMS $\supset$ 2-fluoropropiophenone (**1**), (GCHMS)<sub>3</sub> $\supset$ 2-chlorocyclooctanone (**10**), and (GCHMS)<sub>3</sub> $\supset$ 2-bromocyclooctanone (**11**) were collected at 100 K using a Rigaku XtaLAB Synergy instrument equipped with a graphite monochromator (Cu  $K\alpha$  radiation,  $\lambda = 1.5406$  Å) and a HyPix-6000HE detector. Data was processed using CrysAlisPro V 1.171.42.54A, and absorption corrections were applied using spherical harmonics or through face indexing using SCALE3 ABSPACK. The structures were solved by intrinsic phasing methods (SHELXT or SHELXS) and the structure models were completed and refined using the full-matrix least-square methods on  $F^2$  (SHELXL).<sup>5,6</sup> Non-hydrogen atoms in the structures were refined with anisotropic displacement parameters, and hydrogen atoms on carbons were placed in idealized positions (C-H = 0.95-1.00 Å) and included as riding with  $U_{\text{iso}}(\text{H}) = 1.2$  or  $1.5U_{\text{eq}}(\text{non-H})$ . PLATON/SQUEEZE was used to remove disordered guest/solvent molecules that could not be refined in **1**.<sup>7</sup> Restraints for interatomic distances and thermal displacement parameters were used for disordered host molecules in **2**, **6**, **7**, **8**. Benzene rings in **2**, **3**, **4**, **6**, **7**, **8** were constrained to have idealized geometry. The geometry of the rest of the molecule and

thermal displacement parameters for the whole guest molecule were restrained to different extent depending on the severity of disorder for all crystal structures determined here. Crystal structures of **6** and **9** were refined as inverse twins. The constraints and restraints applied to the structures in refinement did not affect their conformer classification. Graphical representation of crystallographic data was done using Mercury (Version 4.3.1).<sup>8</sup> Crystallographic data of these structures, including cif, res, fcf, and hkl files, have been deposited with the Cambridge Crystallographic Data Centre with Numbers 2123655, 2307222-2307223, and 2364251-2364258. These data can be obtained free of charge via [www.ccdc.cam.ac.uk/data\\_request/cif](http://www.ccdc.cam.ac.uk/data_request/cif), or by emailing [data\\_request@ccdc.cam.ac.uk](mailto:data_request@ccdc.cam.ac.uk), or by contacting The Cambridge Crystallographic Data Centre, 12 Union Road, Cambridge CB2 1EZ, UK; fax: +44 1223 336033.

**Table S1.** Detailed crystallographic data of GCHMS inclusion compounds with 2-fluoro, 2-chloro-, and 2-bromopropiophenone guests.

| Compound name                                                                    | GCHMS $\supset$ 2-fluoropropiophenone                          | (GCHMS) $_4\supset$ 2-chloropropiophenone                                                              | (GCHMS) $_4\supset$ 2-bromopropiophenone                                                             |
|----------------------------------------------------------------------------------|----------------------------------------------------------------|--------------------------------------------------------------------------------------------------------|------------------------------------------------------------------------------------------------------|
| <b>Structure file name</b>                                                       | <b>1</b>                                                       | <b>2</b>                                                                                               | <b>3</b>                                                                                             |
| <b>X-ray lab code</b>                                                            | mds189_auto_sq                                                 | 147d_Hunter                                                                                            | 23mdw94d                                                                                             |
| <b>CCDC no.</b>                                                                  | 2364251                                                        | 2364253                                                                                                | 2364252                                                                                              |
| <b>Formula by X-ray</b>                                                          | C <sub>7</sub> H <sub>17</sub> N <sub>3</sub> O <sub>3</sub> S | C <sub>17.5</sub> H <sub>37.5</sub> Cl <sub>0.39</sub> N <sub>6</sub> O <sub>6.39</sub> S <sub>2</sub> | C <sub>18.5</sub> H <sub>38.5</sub> Br <sub>0.5</sub> N <sub>6</sub> O <sub>6.5</sub> S <sub>2</sub> |
| <b>Formula weight</b>                                                            | 223.29                                                         | 512.20                                                                                                 | 553.13                                                                                               |
| <b>Crystal habit</b>                                                             | colorless plate                                                | colorless plate                                                                                        | colorless plate                                                                                      |
| <b>Crystal size (mm)</b>                                                         | 0.550 × 0.180 × 0.070                                          | 0.35 × 0.27 × 0.01                                                                                     | 0.29 × 0.18 × 0.02                                                                                   |
| <b>Crystal system</b>                                                            | orthorhombic                                                   | monoclinic                                                                                             | monoclinic                                                                                           |
| <b>Space group (no.)</b>                                                         | <i>Pnma</i> (62)                                               | <i>Pn</i> (7)                                                                                          | <i>Pn</i> (7)                                                                                        |
| <b>a (Å)</b>                                                                     | 17.2223(4)                                                     | 17.5076(8)                                                                                             | 17.4620(7)                                                                                           |
| <b>b (Å)</b>                                                                     | 7.28010(10)                                                    | 8.6683(4)                                                                                              | 8.6851(3)                                                                                            |
| <b>c (Å)</b>                                                                     | 12.1354(2)                                                     | 19.0441(8)                                                                                             | 19.0810(7)                                                                                           |
| <b><math>\alpha</math> (°)</b>                                                   | 90                                                             | 90                                                                                                     | 90                                                                                                   |
| <b><math>\beta</math> (°)</b>                                                    | 90                                                             | 99.021(3)                                                                                              | 99.365(2)                                                                                            |
| <b><math>\gamma</math> (°)</b>                                                   | 90                                                             | 90                                                                                                     | 90                                                                                                   |
| <b>V (Å<sup>3</sup>)</b>                                                         | 1521.54(5)                                                     | 2854.4(2)                                                                                              | 2855.24(18)                                                                                          |
| <b>Z</b>                                                                         | 4                                                              | 4                                                                                                      | 4                                                                                                    |
| <b>D<sub>c</sub> (g cm<sup>-3</sup>)</b>                                         | 0.975                                                          | 1.192                                                                                                  | 1.287                                                                                                |
| <b>F(000)</b>                                                                    | 480.0                                                          | 1097.0                                                                                                 | 1172.0                                                                                               |
| <b><math>\mu</math> (mm<sup>-1</sup>)</b>                                        | 1.851                                                          | 2.375                                                                                                  | 2.878                                                                                                |
| <b>Total reflections</b>                                                         | 8001                                                           | 144528                                                                                                 | 64513                                                                                                |
| <b>Unique reflections</b>                                                        | 1576                                                           | 11470                                                                                                  | 11250                                                                                                |
| <b>R<sub>int</sub></b>                                                           | 0.0430                                                         | 0.0707                                                                                                 | 0.0868                                                                                               |
| <b>R<sub>1</sub><sup>a</sup> [<i>I</i> &gt; 2 <math>\sigma</math>(<i>I</i>)]</b> | 0.0388                                                         | 0.0826                                                                                                 | 0.1263                                                                                               |
| <b>wR<sub>2</sub><sup>b</sup> (all data)</b>                                     | 0.1161                                                         | 0.2360                                                                                                 | 0.3666                                                                                               |
| <b>GOF (all data)</b>                                                            | 1.097                                                          | 1.043                                                                                                  | 1.588                                                                                                |
| <b>Flack parameter<sup>c</sup></b>                                               | n/a                                                            | -0.021(19)                                                                                             | -0.11(4)                                                                                             |

<sup>a</sup>R<sub>1</sub> =  $\sum||F_o| - |F_c|| / \sum|F_o|$ ; <sup>b</sup>wR<sub>2</sub> =  $\{\sum[w(F_o^2 - F_c^2)^2] / \sum[w(F_o^2)^2]\}^{1/2}$ ; <sup>c</sup>n/a – not applicable.

**Table S2.** Detailed crystallographic data of G<sub>2</sub>BPDS inclusion compounds with 2-fluoro, 2-chloro-, and 2-bromopropiophenone guests. The crystal structure of G<sub>2</sub>BPDS⊃2-chloropropiophenone (**5**) was published previously.<sup>9</sup>

| Compound name                                                                | G <sub>2</sub> BPDS⊃2-fluoropropiophenone                                     | G <sub>2</sub> BPDS⊃2-chloropropiophenone                                      | G <sub>2</sub> BPDS⊃2-bromopropiophenone                                       |
|------------------------------------------------------------------------------|-------------------------------------------------------------------------------|--------------------------------------------------------------------------------|--------------------------------------------------------------------------------|
| <b>Structure file name</b>                                                   | <b>4</b>                                                                      | <b>5</b>                                                                       | <b>6</b>                                                                       |
| <b>X-ray lab code</b>                                                        | 23mdw65d                                                                      | 21mdw1d                                                                        | 23mdw67d                                                                       |
| <b>CCDC no.</b>                                                              | 2364258                                                                       | 2123655                                                                        | 2364257                                                                        |
| <b>Formula by X-ray</b>                                                      | C <sub>23</sub> H <sub>29</sub> FN <sub>6</sub> O <sub>7</sub> S <sub>2</sub> | C <sub>23</sub> H <sub>33</sub> ClN <sub>6</sub> O <sub>9</sub> S <sub>2</sub> | C <sub>23</sub> H <sub>33</sub> BrN <sub>6</sub> O <sub>9</sub> S <sub>2</sub> |
| <b>Formula weight</b>                                                        | 584.64                                                                        | 637.12                                                                         | 681.58                                                                         |
| <b>Crystal habit</b>                                                         | colorless plate                                                               | colorless plate                                                                | colorless needle                                                               |
| <b>Crystal size (mm)</b>                                                     | 0.360 × 0.190 × 0.030                                                         | 0.030 × 0.130 × 0.325                                                          | 0.250 × 0.050 × 0.020                                                          |
| <b>Crystal system</b>                                                        | triclinic                                                                     | monoclinic                                                                     | monoclinic                                                                     |
| <b>Space group (no.)</b>                                                     | <i>P</i> -1 (2)                                                               | <i>Cc</i> (9)                                                                  | <i>Cc</i> (9)                                                                  |
| <b><i>a</i> (Å)</b>                                                          | 7.3252(5)                                                                     | 31.790(3)                                                                      | 31.674(3)                                                                      |
| <b><i>b</i> (Å)</b>                                                          | 12.7523(9)                                                                    | 11.6317(10)                                                                    | 11.6225(12)                                                                    |
| <b><i>c</i> (Å)</b>                                                          | 30.161(2)                                                                     | 8.2943(7)                                                                      | 8.2592(8)                                                                      |
| <b><i>α</i> (°)</b>                                                          | 96.337(4)                                                                     | 90                                                                             | 90                                                                             |
| <b><i>β</i> (°)</b>                                                          | 94.485(4)                                                                     | 101.394(3)                                                                     | 101.032(6)                                                                     |
| <b><i>γ</i> (°)</b>                                                          | 93.536(4)                                                                     | 90                                                                             | 90                                                                             |
| <b><i>V</i> (Å<sup>3</sup>)</b>                                              | 2784.6(3)                                                                     | 3006.6(4)                                                                      | 2984.3(5)                                                                      |
| <b><i>Z</i></b>                                                              | 4                                                                             | 4                                                                              | 4                                                                              |
| <b><i>D<sub>c</sub></i> (g cm<sup>-3</sup>)</b>                              | 1.395                                                                         | 1.408                                                                          | 1.517                                                                          |
| <b><i>F</i>(000)</b>                                                         | 1224.0                                                                        | 1336                                                                           | 1408.0                                                                         |
| <b><i>μ</i> (mm<sup>-1</sup>)</b>                                            | 0.250                                                                         | 0.324                                                                          | 1.576                                                                          |
| <b>Total reflections</b>                                                     | 50789                                                                         | 25319                                                                          | 21396                                                                          |
| <b>Unique reflections</b>                                                    | 13848                                                                         | 7432                                                                           | 7077                                                                           |
| <b><i>R</i><sub>int</sub></b>                                                | 0.0624                                                                        | 0.0452                                                                         | 0.1091                                                                         |
| <b><i>R</i><sub>1</sub><sup>a</sup> [<i>I</i> &gt; 2 <i>σ</i>(<i>I</i>)]</b> | 0.1468                                                                        | 0.0589                                                                         | 0.0831                                                                         |
| <b><i>wR</i><sub>2</sub><sup>b</sup> (all data)</b>                          | 0.3125                                                                        | 0.1649                                                                         | 0.1996                                                                         |
| <b>GOF (all data)</b>                                                        | 1.131                                                                         | 1.066                                                                          | 1.053                                                                          |
| <b>Flack parameter<sup>c</sup></b>                                           | n/a                                                                           | 0.34(15)                                                                       | 0.33(3)                                                                        |

<sup>a</sup>*R*<sub>1</sub> =  $\sum ||F_o| - |F_c|| / \sum |F_o|$ ; <sup>b</sup>*wR*<sub>2</sub> =  $\{\sum [w(F_o^2 - F_c^2)^2] / \sum [w(F_o^2)^2]\}^{1/2}$ ; <sup>c</sup>n/a – not applicable.

**Table S3.** Detailed crystallographic data of G<sub>2</sub>1,5NDS inclusion compounds with 2-fluoro-, 2-chloro-, and 2-bromopropiophenone guests.

| Compound name                                    | G <sub>2</sub> 1,5NDS⊃2-fluoropropiophenone                                   | G <sub>2</sub> 1,5NDS⊃2-chloropropiophenone                                    | G <sub>2</sub> 1,5NDS⊃2-bromopropiophenone                                     |
|--------------------------------------------------|-------------------------------------------------------------------------------|--------------------------------------------------------------------------------|--------------------------------------------------------------------------------|
| <b>Structure file name</b>                       | <b>7</b>                                                                      | <b>8</b>                                                                       | <b>9</b>                                                                       |
| <b>X-ray lab code</b>                            | 23mdw6d                                                                       | 24mdw38d                                                                       | 23mdw66d                                                                       |
| <b>CCDC no.</b>                                  | 2364254                                                                       | 2364256                                                                        | 2364255                                                                        |
| <b>Formula by X-ray</b>                          | C <sub>21</sub> H <sub>27</sub> FN <sub>6</sub> O <sub>7</sub> S <sub>2</sub> | C <sub>21</sub> H <sub>27</sub> ClN <sub>6</sub> O <sub>7</sub> S <sub>2</sub> | C <sub>21</sub> H <sub>27</sub> BrN <sub>6</sub> O <sub>7</sub> S <sub>2</sub> |
| <b>Formula weight</b>                            | 558.60                                                                        | 575.05                                                                         | 619.51                                                                         |
| <b>Crystal habit</b>                             | colorless needle                                                              | colorless plate                                                                | colorless needle                                                               |
| <b>Crystal size (mm)</b>                         | 0.200 × 0.050 × 0.030                                                         | 0.910 × 0.270 × 0.110                                                          | 0.370 × 0.180 × 0.050                                                          |
| <b>Crystal system</b>                            | orthorhombic                                                                  | monoclinic                                                                     | monoclinic                                                                     |
| <b>Space group (no.)</b>                         | <i>Pn</i> nm (58)                                                             | <i>P</i> 2 <sub>1</sub> / <i>n</i> (14)                                        | <i>P</i> 2 <sub>1</sub> (4)                                                    |
| <b>a (Å)</b>                                     | 7.9767(8)                                                                     | 7.6588(5)                                                                      | 7.7603(6)                                                                      |
| <b>b (Å)</b>                                     | 21.0642(19)                                                                   | 20.9928(11)                                                                    | 21.0415(17)                                                                    |
| <b>c (Å)</b>                                     | 7.4827(7)                                                                     | 8.0310(5)                                                                      | 7.9327(6)                                                                      |
| <b>α (°)</b>                                     | 90                                                                            | 90                                                                             | 90                                                                             |
| <b>β (°)</b>                                     | 90                                                                            | 90.117(4)                                                                      | 99.550(4)                                                                      |
| <b>γ (°)</b>                                     | 90                                                                            | 90                                                                             | 90                                                                             |
| <b>V (Å<sup>3</sup>)</b>                         | 1257.3(2)                                                                     | 1291.22(13)                                                                    | 1277.37(17)                                                                    |
| <b>Z</b>                                         | 2                                                                             | 2                                                                              | 2                                                                              |
| <b>D<sub>c</sub> (g cm<sup>-3</sup>)</b>         | 1.476                                                                         | 1.479                                                                          | 1.611                                                                          |
| <b>F(000)</b>                                    | 584.0                                                                         | 600.0                                                                          | 636.0                                                                          |
| <b>μ (mm<sup>-1</sup>)</b>                       | 0.273                                                                         | 0.363                                                                          | 1.827                                                                          |
| <b>Total reflections</b>                         | 12389                                                                         | 12933                                                                          | 22477                                                                          |
| <b>Unique reflections</b>                        | 1206                                                                          | 3239                                                                           | 5651                                                                           |
| <b>R<sub>int</sub></b>                           | 0.0939                                                                        | 0.0541                                                                         | 0.0774                                                                         |
| <b>R<sub>1</sub><sup>a</sup> [I &gt; 2 σ(I)]</b> | 0.0843                                                                        | 0.1588                                                                         | 0.0669                                                                         |
| <b>wR<sub>2</sub><sup>b</sup> (all data)</b>     | 0.2150                                                                        | 0.4046                                                                         | 0.1832                                                                         |
| <b>GOF (all data)</b>                            | 1.059                                                                         | 1.120                                                                          | 1.110                                                                          |
| <b>Flack parameter<sup>c</sup></b>               | n/a                                                                           | n/a                                                                            | 0.13(2)                                                                        |

<sup>a</sup>R<sub>1</sub> = Σ||F<sub>o</sub>| - |F<sub>c</sub>|| / Σ|F<sub>o</sub>|; <sup>b</sup>wR<sub>2</sub> = {Σ[w(F<sub>o</sub><sup>2</sup> - F<sub>c</sub><sup>2</sup>)<sup>2</sup>] / Σ[w(F<sub>o</sub><sup>2</sup>)<sup>2</sup>]}<sup>1/2</sup>; <sup>c</sup>n/a – not applicable.

**Table S4.** Detailed crystallographic data of GCHMS inclusion compounds with 2-chlorocyclooctanone and 2-bromocyclooctanone guests. These two inclusion compounds were reported previously.<sup>10</sup>

| Compound name                                    | (GCHMS) <sub>3</sub> ⊃2-chlorocyclooctanone                                                              | (GCHMS) <sub>3</sub> ⊃2-bromocyclooctanone                                      |
|--------------------------------------------------|----------------------------------------------------------------------------------------------------------|---------------------------------------------------------------------------------|
| <b>Structure file name</b>                       | <b>10</b>                                                                                                | <b>11</b>                                                                       |
| <b>X-ray lab code</b>                            | mdr054                                                                                                   | mds056                                                                          |
| <b>CCDC no.</b>                                  | 2307222                                                                                                  | 2307223                                                                         |
| <b>Formula by X-ray</b>                          | C <sub>25.97</sub> H <sub>59.07</sub> Cl <sub>0.62</sub> N <sub>9</sub> O <sub>9.62</sub> S <sub>3</sub> | C <sub>29</sub> H <sub>64</sub> BrN <sub>9</sub> O <sub>10</sub> S <sub>3</sub> |
| <b>Formula weight</b>                            | 833.54                                                                                                   | 875.0                                                                           |
| <b>Crystal habit</b>                             | colorless plate                                                                                          | colorless plate                                                                 |
| <b>Crystal size (mm)</b>                         | 0.490 x 0.090 x 0.040                                                                                    | 0.230 x 0.150 x 0.020                                                           |
| <b>Crystal system</b>                            | monoclinic                                                                                               | orthorhombic                                                                    |
| <b>Space group (no.)</b>                         | <i>P</i> 2 <sub>1</sub> / <i>c</i> (14)                                                                  | <i>Pmn</i> 2 <sub>1</sub> (31)                                                  |
| <b>a (Å)</b>                                     | 12.4187(2)                                                                                               | 20.6941(5)                                                                      |
| <b>b (Å)</b>                                     | 31.3315(4)                                                                                               | 8.4766(3)                                                                       |
| <b>c (Å)</b>                                     | 12.52302(19)                                                                                             | 12.3109(3)                                                                      |
| <b>α (°)</b>                                     | 90                                                                                                       | 90                                                                              |
| <b>β (°)</b>                                     | 119.397(4)                                                                                               | 90                                                                              |
| <b>γ (°)</b>                                     | 90                                                                                                       | 90                                                                              |
| <b>V (Å<sup>3</sup>)</b>                         | 4245.27(14)                                                                                              | 2159.52(11)                                                                     |
| <b>Z</b>                                         | 4                                                                                                        | 2                                                                               |
| <b>D<sub>c</sub> (g cm<sup>-3</sup>)</b>         | 1.204                                                                                                    | 1.346                                                                           |
| <b>F(000)</b>                                    | 1654                                                                                                     | 928.0                                                                           |
| <b>μ (mm<sup>-1</sup>)</b>                       | 2.415                                                                                                    | 3.145                                                                           |
| <b>Total reflections</b>                         | 52511                                                                                                    | 10457                                                                           |
| <b>Unique reflections</b>                        | 8183                                                                                                     | 3394                                                                            |
| <b>R<sub>int</sub></b>                           | 0.0428                                                                                                   | 0.0374                                                                          |
| <b>R<sub>1</sub><sup>a</sup> [I &gt; 2 σ(I)]</b> | 0.0747                                                                                                   | 0.0628                                                                          |
| <b>wR<sub>2</sub><sup>b</sup> (all data)</b>     | 0.2400                                                                                                   | 0.1765                                                                          |
| <b>GOF (all data)</b>                            | 1.038                                                                                                    | 1.044                                                                           |
| <b>Flack parameter<sup>c</sup></b>               | n/a                                                                                                      | -0.006(19)                                                                      |

<sup>a</sup>R<sub>1</sub> = Σ||F<sub>o</sub>| - |F<sub>c</sub>||/Σ|F<sub>o</sub>|; <sup>b</sup>wR<sub>2</sub> = {Σ[w(F<sub>o</sub><sup>2</sup> - F<sub>c</sub><sup>2</sup>)<sup>2</sup>]/Σ[w(F<sub>o</sub><sup>2</sup>)<sup>2</sup>]}<sup>1/2</sup>; <sup>c</sup>n/a – not applicable.

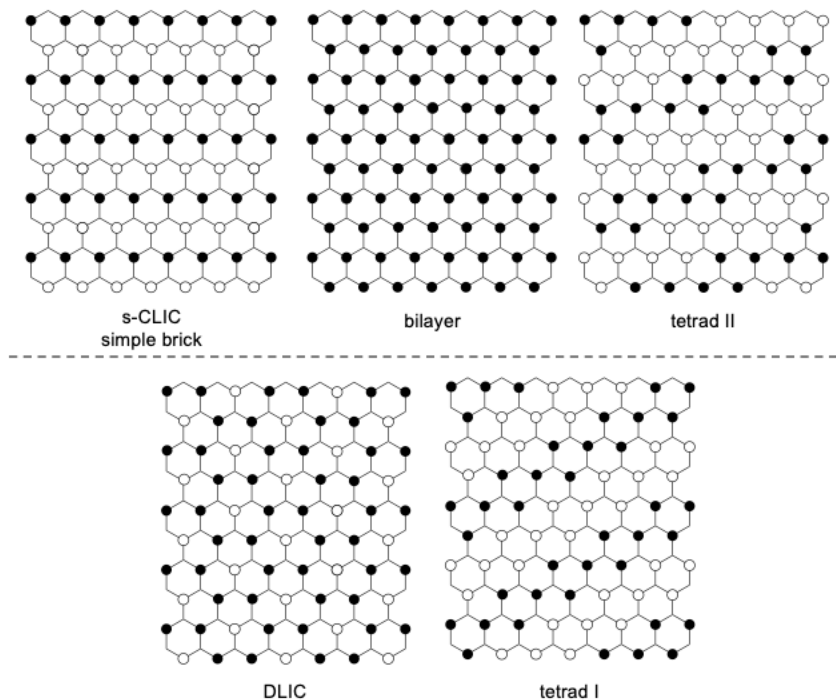

**Figure S1.** Projection topologies of the architectures observed in the inclusion compounds with (top)  $\alpha$ -halopropiophenone guests and (bottom) with  $\alpha$ -halocyclooctanone guests. Filled and open circles depict organic groups projecting from the sulfonate nodes above and below the sheet, respectively. The guanidinium ions sit on the undecorated nodes of the hexagonal tiling.

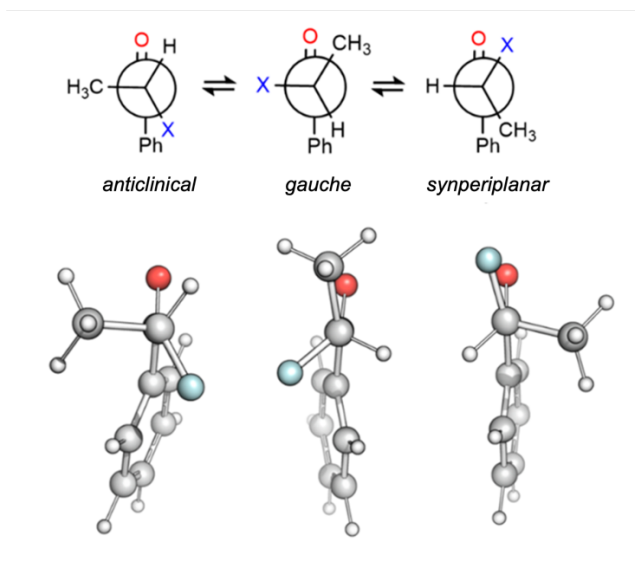

**Figure S2.** The three low energy minima conformers of the  $\alpha$ -halopropiophenones studied by Francisco et al.<sup>11</sup> The labels for each conformer, *anticlinal*, *gauche*, and *synperiplanar*, are referred to throughout the manuscript and indicative of O-C-C-X dihedral angles ( $\phi$ ) of  $135^\circ - -135^\circ$ ,  $|45^\circ - 135^\circ|$ , and  $-45^\circ - 45^\circ$ , respectively. Adapted with permission from *J. Phys. Chem. A* 2024, 128, 9, 1566–1575. Copyright 2024 American Chemical Society.<sup>11</sup>



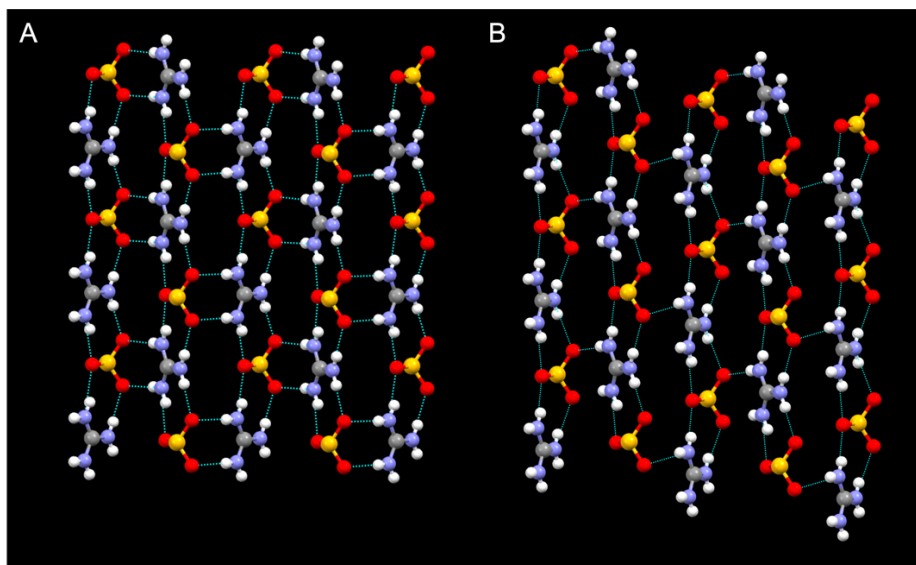

**Figure S3.** GS sheets in  $G_{21,5NDS=2}$ -chloropropiophenone and  $G_{21,5NDS=2}$ -bromopropiophenone.

A

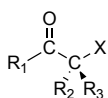

$R_1$  = any atom  
 $R_2; R_3$  = any non-halogen atom

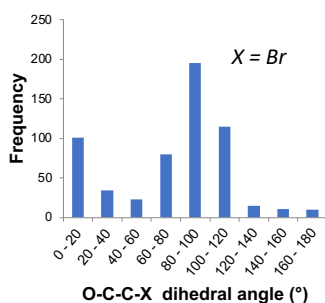

| O-C-C-X dihedral angle (°) | Number of entries |
|----------------------------|-------------------|
| 0 - 20                     | 101               |
| 20 - 40                    | 34                |
| 40 - 60                    | 23                |
| 60 - 80                    | 80                |
| 80 - 100                   | 195               |
| 100 - 120                  | 115               |
| 120 - 140                  | 15                |
| 140 - 160                  | 11                |
| 160 - 180                  | 10                |
| total                      | 584               |

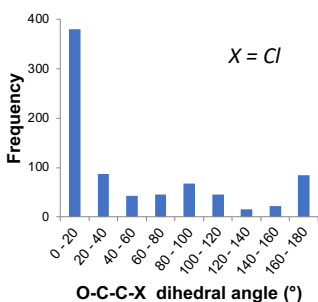

| O-C-C-X dihedral angle (°) | Number of entries |
|----------------------------|-------------------|
| 0 - 20                     | 381               |
| 20 - 40                    | 87                |
| 40 - 60                    | 43                |
| 60 - 80                    | 46                |
| 80 - 100                   | 68                |
| 100 - 120                  | 45                |
| 120 - 140                  | 15                |
| 140 - 160                  | 22                |
| 160 - 180                  | 85                |
| total                      | 792               |

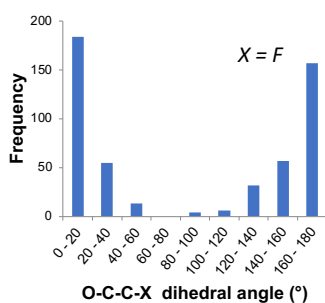

| O-C-C-X dihedral angle (°) | Number of entries |
|----------------------------|-------------------|
| 0 - 20                     | 184               |
| 20 - 40                    | 55                |
| 40 - 60                    | 13                |
| 60 - 80                    | 0                 |
| 80 - 100                   | 4                 |
| 100 - 120                  | 6                 |
| 120 - 140                  | 32                |
| 140 - 160                  | 57                |
| 160 - 180                  | 157               |
| total                      | 508               |

B

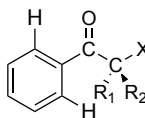

$R_1; R_2$  = any non-halogen atom

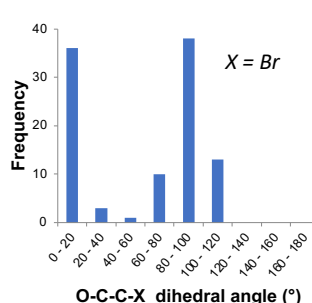

| O-C-C-X dihedral angle (°) | Number of entries |
|----------------------------|-------------------|
| 0 - 20                     | 36                |
| 20 - 40                    | 3                 |
| 40 - 60                    | 1                 |
| 60 - 80                    | 10                |
| 80 - 100                   | 38                |
| 100 - 120                  | 13                |
| 120 - 140                  | 0                 |
| 140 - 160                  | 0                 |
| 160 - 180                  | 0                 |
| total                      | 101               |

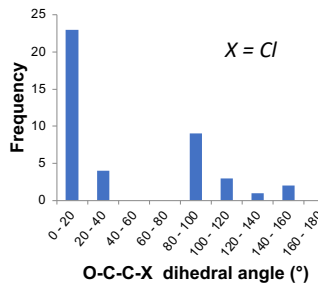

| O-C-C-X dihedral angle (°) | Number of entries |
|----------------------------|-------------------|
| 0 - 20                     | 23                |
| 20 - 40                    | 4                 |
| 40 - 60                    | 0                 |
| 60 - 80                    | 0                 |
| 80 - 100                   | 9                 |
| 100 - 120                  | 3                 |
| 120 - 140                  | 1                 |
| 140 - 160                  | 2                 |
| 160 - 180                  | 0                 |
| total                      | 42                |

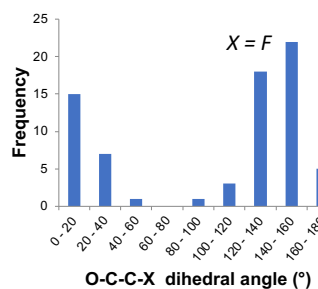

| O-C-C-X dihedral angle (°) | Number of entries |
|----------------------------|-------------------|
| 0 - 20                     | 15                |
| 20 - 40                    | 7                 |
| 40 - 60                    | 1                 |
| 60 - 80                    | 0                 |
| 80 - 100                   | 1                 |
| 100 - 120                  | 3                 |
| 120 - 140                  | 18                |
| 140 - 160                  | 22                |
| 160 - 180                  | 5                 |
| total                      | 72                |

**Figure S4.** Histograms of surveys from the Cambridge Structural Database<sup>12</sup> of  $\alpha$ -halogenated ketones. The details of the surveys include organic compounds only with acyclic carbon atoms bonded to oxygen and the halogen. The survey was performed for four fragments intended to mimic the composition of the  $\alpha$ -halogenated ketones wherein (A) the ketone contained only a single halogen atom at the  $\alpha$  position (i.e. excluding di- and tri-halogenated compounds) and any other substituents; (B) the ketone contained only a single halogen atom at the  $\alpha$  position and a phenyl group with ortho hydrogen atoms. The fragments can be seen above the histograms and tables.

C

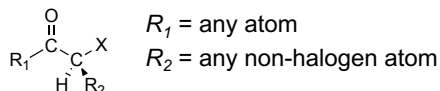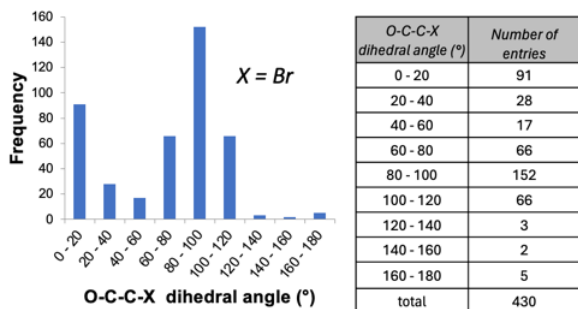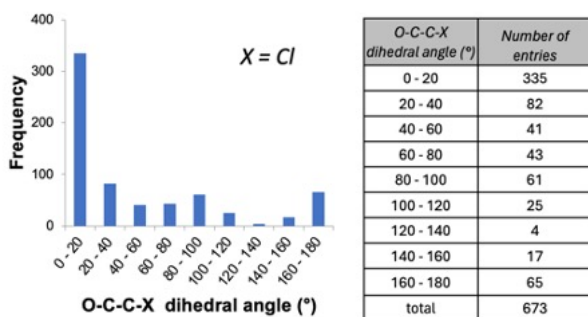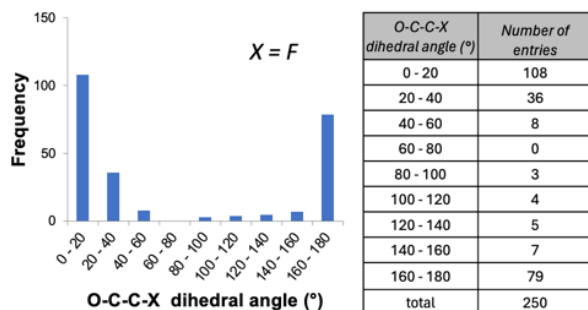

D

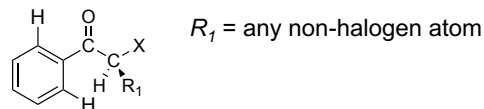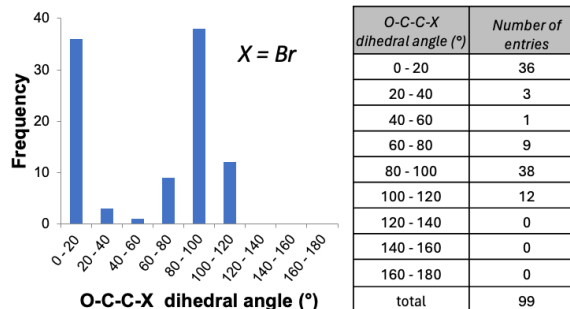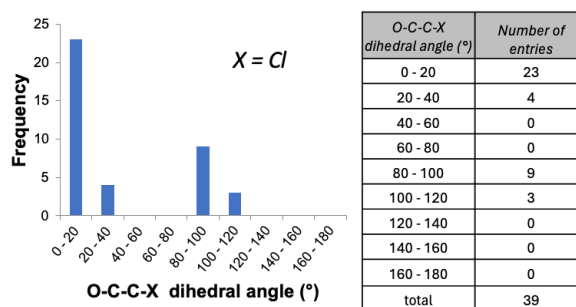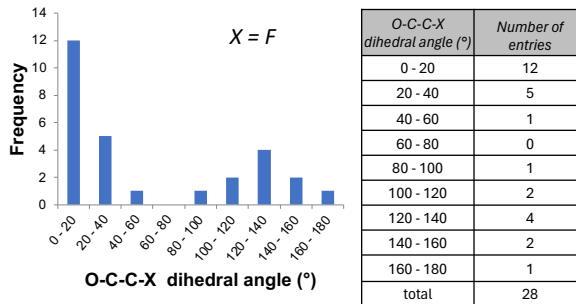

**Figure S4 (continued).** Histograms of surveys from the Cambridge Structural Database<sup>12</sup> of  $\alpha$ -halogenated ketones. The details of the surveys include organic compounds only with acyclic carbon atoms bonded to oxygen and the halogen. The survey was performed for four fragments intended to mimic the composition of the  $\alpha$ -halogenated ketones wherein (C) the ketone contained only a single halogen atom and one hydrogen atom at the  $\alpha$  position and any other substituents and (D) the ketone contained only a single halogen atom and a hydrogen atom at the  $\alpha$  position and a phenyl group with ortho-substituted hydrogen atoms. The fragments can be seen above the histograms and tables.

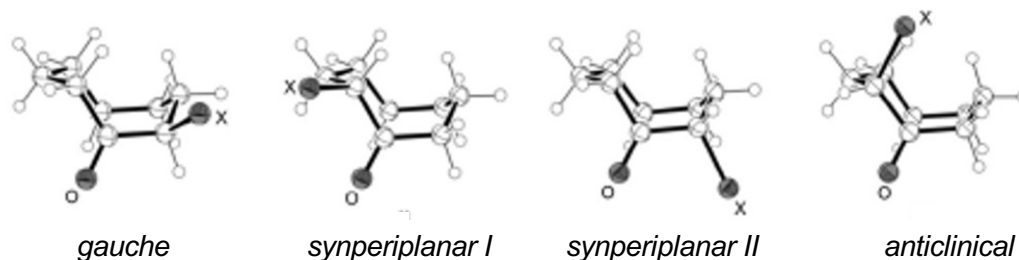

**Figure S5.** The four low energy conformers of  $\alpha$ -halocyclooctanones as determined by Rozada et al.<sup>13</sup> where X = F, Cl, Br, and I. There are two *synperiplanar* conformations identified as low energy conformers, differentiated by the location of the halogen on the chair-boat conformation wherein (I) the halogen is oriented axially on the chair side of the carbonyl and (II) the halogen is oriented axially on the boat side of the carbonyl. Adapted from *Spectrochim. Acta A Mol. Biomol. Spectrosc.*, 2015, **137**, 176–184, Copyright (2015), with permission from Elsevier.<sup>13</sup>

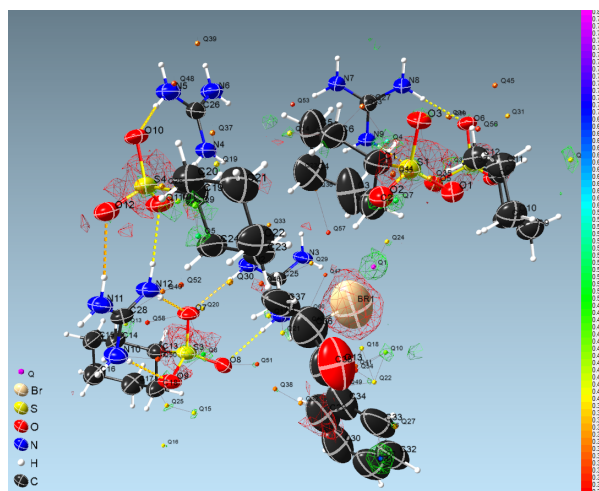

**Figure S6.** The residual density plot for GCHMS-2-bromopropiophenone (compound **3**; 23mdw94d). The bromine atom could not be refined with full occupancy. The red gridlines surrounding the bromine atom represent a deficit of electrons compared to that expected for bromine at that position. Nonetheless, the electron density at this position is sufficient for an unambiguous assignment of the *gauche* conformation for 2-bromopropiophenone.

## References

- 1 P. A. Champagne, J. Pomarole, M.-È. Thérien, Y. Benhassine, S. Beaulieu, C. Y. Legault and J.F. Paquin, *Org. Lett.*, 2013, **15**, 2210–2213.
- 2 N. Ahlsten, A. Bermejo Gómez and B. Martín-Matute, *Angew. Chem., Int. Ed.*, 2013, **52**, 6273–6276.
- 3 N. D. Bartolo, K. M. Demkiw, E. M. Valentín, C. T. Hu, A. A. Arabi and K. A. Woerpel, *J. Org. Chem.*, 2021, **86**, 7203–7217.
- 4 Bruker, APEX4 Bruker, Madison, WI 2020.
- 5 G. M. Sheldrick, *Acta Crystallogr. A*, 2015, **71**, 3–8.
- 6 G. M. Sheldrick, *Acta Crystallogr. C Struct. Chem.*, 2015, **71**, 3–8.
- 7 A. L. Spek, *Acta Crystallogr. C Struct. Chem.*, 2015, **71**, 9–18.
- 8 C. F. Macrae, I. Sovago, S. J. Cottrell, P. T. A. Galek, P. McCabe, E. Pidcock, M. Platings, G. P. Shields, J. S. Stevens, M. Towler and P. A. Wood, *J. Appl. Crystallogr.*, 2020, **53**, 226–235.
- 9 N. D. Bartolo, K. M. Demkiw, J. A. Read, E. M. Valentín, Y. Yang, A. M. Dillon, C. T. Hu, M. D. Ward and K. A. Woerpel, *J. Org. Chem.*, 2022, **87**, 3042–3065.
- 10 A. M. Dillon, A. Yusov, M. T. Chaudhry, J. A. Newman, K. M. Demkiw, K. A. Woerpel, A. Y. Lee and M. D. Ward, *Cryst. Growth Des.*, 2024, **24**, 3483–3490.
- 11 C. B. Francisco, C. de S. Fernandes, F. Franco Dourado, G. de F. Gauze, R. Rittner, R. S. Prosser and E. A. Basso, *J. Phys. Chem. A*, 2024, **128**, 1566–1575.
- 12 C. R. Groom, I. J. Bruno, M. P. Lightfoot and S. C. Ward, *Acta Cryst. B*, 2016, **72**, 171–179.
- 13 T. C. Rozada, G. F. Gauze, F. A. Rosa, D. C. Favaro, R. Rittner, R. M. Pontes and E. A. Basso, *Spectrochim. Acta A Mol. Biomol. Spectrosc.*, 2015, **137**, 176–184.
